# Supplementary material for: Drought Influences Fungal Community Dynamics in the Grapevine Rhizosphere and Root Microbiome
Source: MDPI journal article supplement (doi:10.3390/jof7090686), 2021-08-25

**Table S1.** Physicochemical properties of the grapevine nursery soil examined in this study.

| Grapevine nursery soil             |                          |
|------------------------------------|--------------------------|
| Coordinates                        | 34°34'48" S, 56°17'50" W |
| Location                           | Canelones                |
| Altitude (m)                       | 33                       |
| Physicochemical properties         |                          |
| pH H <sub>2</sub> O                | 6.0                      |
| K meq/100g                         | 1.33                     |
| Mg meq/100g                        | 3.3                      |
| Ca meq/100g                        | 11.5                     |
| Na meq/100g                        | 1.25                     |
| P Bray mg/Kg                       | 137.0                    |
| N-NO <sub>3</sub> mg/kg            | 52.0                     |
| SOM%                               | 4.8                      |
| Clay%                              | 28.9                     |
| Sand%                              | 12.3                     |
| Silt%                              | 58.8                     |
| Water content at field capacity %* | 34.78                    |

\* % soil moisture by weight

**Table S2.** Number of reads, total OTUs and alpha diversity indices.

| Index   | Bulk soil                    |                  |                  |                  |                  |                  |
|---------|------------------------------|------------------|------------------|------------------|------------------|------------------|
|         | Sampling Time 1              |                  |                  | Sampling Time 2  |                  |                  |
|         | SWD <sup>a</sup>             | MWD <sup>b</sup> | AWD <sup>c</sup> | SWD              | MWD              | AWD              |
| Reads   | 23102.7 ± 416.8 <sup>d</sup> | 22924.8 ± 363.9  | 22429.8 ± 399.4  | 22859.1 ± 838.1  | 23285.8 ± 1057.6 | 28348.4 ± 722.4  |
| OTUs    | 153                          | 205              | 212              | 187              | 200              | 215              |
| Chao1   | 67.06 ± 2.07                 | 75.87 ± 2.98     | 72.1 ± 2.07      | 62.32 ± 2.41     | 70.17 ± 1.48     | 74.89 ± 1.45     |
| Shannon | 2.55 ± 0.03                  | 2.84 ± 0.10      | 2.86 ± 0.08      | 2.41 ± 0.06      | 2.42 ± 0.03      | 2.57 ± 0.03      |
| Index   | Rhizosphere                  |                  |                  |                  |                  |                  |
|         | Sampling Time 1              |                  |                  | Sampling Time 2  |                  |                  |
|         | SWD                          | MWD              | AWD              | SWD <sup>e</sup> | MWD <sup>f</sup> | AWD <sup>g</sup> |
| Reads   | 23863.8 ± 737.9              | 24057 ± 1222.0   | 23169.3 ± 531.0  | 24016.8 ± 2410.3 | 22719.8 ± 948.5  | 23993.4 ± 1055.0 |
| OTUs    | 245                          | 195              | 217              | 229              | 219              | 192              |
| Chao1   | 87.37 ± 3.15                 | 64.78 ± 1.28     | 77.14 ± 2.11     | 80.04 ± 2.63     | 78.79 ± 3.69     | 68.31 ± 2.25     |
| Shannon | 2.59 ± 0.04                  | 2.44 ± 0.08      | 2.91 ± 0.08      | 2.45 ± 0.07      | 2.61 ± 0.05      | 2.70 ± 0.02      |
| Index   | Root                         |                  |                  |                  |                  |                  |
|         | Sampling Time 1              |                  |                  | Sampling Time 2  |                  |                  |
|         | SWD                          | MWD              | AWD <sup>h</sup> | SWD <sup>i</sup> | MWD              | AWD <sup>j</sup> |
| Reads   | 23059.3 ± 391.9              | 22204.4 ± 309.6  | 22251.8 ± 371.7  | 22077.7 ± 629.8  | 26496.8 ± 685.3  | 30785.9 ± 845.2  |
| OTUs    | 47                           | 85               | 96               | 63               | 65               | 65               |
| Chao1   | 17.88 ± 0.74                 | 21.75 ± 1.26     | 28.40 ± 1.42     | 15.27 ± 0.45     | 21.17 ± 0.71     | 19.64 ± 0.56     |
| Shannon | 2.06 ± 0.03                  | 2.11 ± 0.04      | 2.78 ± 0.04      | 2.13 ± 0.03      | 2.41 ± 0.02      | 2.61 ± 0.02      |

<sup>a</sup> Severe Water Deficit

<sup>b</sup> Moderate Water Deficit

<sup>c</sup> Absence of Water Deficit

<sup>d</sup> Values are the mean of 12 replicates

<sup>e</sup> Samples SU206 and SU223 were removed from the analysis due to the low number of sequences reads

<sup>f</sup> Sample SU245 was removed from the analysis due to the low number of sequences reads

<sup>g</sup> Samples SU289 and SU290 were removed from the analysis due to the low number of sequences reads

<sup>h</sup> Samples SU168 and SU174 were removed from the analysis due to the low number of sequences reads

<sup>i</sup> Sample SU214 was removed from the analysis due to the low number of sequences reads

<sup>j</sup> Sample SU283 was removed from the analysis due to the low number of sequences reads

**Table S3.** Estimates of number of reads, sample coverage and diversity indices at the genus level for fungal profiles.

| Sample ID | Number of reads | Good's coverage (%) | Chao1 richness | Shannon diversity |
|-----------|-----------------|---------------------|----------------|-------------------|
| SU3       | 24878           | 99.97               | 66.8±1.4       | 2.5               |
| SU4       | 23362           | 99.99               | 53.0±0.0       | 2.4               |
| SU5       | 20782           | 99.97               | 72.0±5.5       | 2.5               |
| SU6       | 21329           | 99.99               | 74.0±2.3       | 2.6               |
| SU7       | 22289           | 99.97               | 73.0±0.2       | 2.7               |
| SU8       | 24341           | 99.98               | 66.5±2.6       | 2.4               |
| SU11      | 23552           | 100.00              | 16.0±0.5       | 2.0               |
| SU14      | 22100           | 99.99               | 15.0±0.0       | 1.9               |
| SU16      | 22775           | 99.99               | 18.0±0.5       | 2.1               |
| SU17      | 23200           | 99.99               | 15.0±0.0       | 1.9               |
| SU18      | 21102           | 99.97               | 16.0±0.2       | 2.0               |
| SU19      | 21094           | 99.98               | 17.0±0.2       | 1.9               |
| SU23      | 22107           | 99.99               | 78.0±1.8       | 2.8               |
| SU24      | 20820           | 99.96               | 86.3±5.5       | 2.5               |
| SU25      | 22674           | 99.95               | 86.5±2.9       | 2.6               |
| SU26      | 28490           | 99.96               | 95.2±7.4       | 2.2               |
| SU27      | 21681           | 99.98               | 87.8±4.2       | 2.6               |
| SU28      | 22186           | 99.98               | 80.9±1.4       | 2.6               |
| SU33      | 24624           | 99.99               | 65.3±0.9       | 2.5               |
| SU34      | 21563           | 99.99               | 54.0±0.0       | 2.7               |
| SU35      | 23383           | 99.96               | 66.2±0.5       | 2.5               |
| SU36      | 24500           | 99.99               | 73.0±0.2       | 2.5               |
| SU37      | 24156           | 99.97               | 74.0±0.0       | 2.7               |
| SU38      | 22025           | 99.97               | 67.0±1.8       | 2.6               |
| SU43      | 24552           | 99.99               | 16.0±0.0       | 2.1               |
| SU44      | 21713           | 99.99               | 18.0±0.5       | 2.1               |
| SU45      | 23795           | 99.99               | 22.0±0.2       | 2.1               |
| SU46      | 24193           | 100.00              | 22.5±2.6       | 2.2               |
| SU47      | 25385           | 99.99               | 20.0±0.5       | 2.2               |
| SU48      | 23250           | 99.99               | 19.0±0.5       | 2.1               |
| SU53      | 23306           | 99.98               | 78.0±0.0       | 2.6               |
| SU54      | 22080           | 99.96               | 112.0±10.0     | 2.7               |
| SU55      | 24762           | 99.97               | 88.3±0.7       | 2.6               |
| SU56      | 28583           | 99.96               | 100.4±5.5      | 2.7               |
| SU57      | 24267           | 99.95               | 72.1±5.0       | 2.5               |
| SU58      | 25410           | 99.94               | 83.1±4.0       | 2.5               |
| SU63      | 24236           | 99.97               | 67.3±0.9       | 2.9               |
| SU64      | 23698           | 99.99               | 79.2±1.8       | 3.1               |
| SU65      | 21659           | 99.99               | 77.0±0.0       | 3.1               |
| SU66      | 22208           | 99.98               | 92.8±4.2       | 2.9               |
| SU67      | 20778           | 99.94               | 76.1±2.5       | 2.8               |
| SU68      | 23147           | 99.99               | 67.6±1.2       | 2.9               |
| SU73      | 22580           | 99.97               | 28.0±1.8       | 2.1               |
| SU74      | 21579           | 99.99               | 24.5±2.6       | 2.3               |
| SU75      | 22201           | 99.99               | 18.5±1.3       | 1.9               |

|       |       |        |           |     |
|-------|-------|--------|-----------|-----|
| SU76  | 21264 | 99.98  | 16.0±0.0  | 2.0 |
| SU77  | 20731 | 99.99  | 19.0±0.5  | 2.1 |
| SU78  | 22232 | 100.00 | 17.0±0.2  | 2.1 |
| SU83  | 24288 | 99.99  | 62.3±0.9  | 2.6 |
| SU84  | 22429 | 99.97  | 67.9±2.3  | 2.7 |
| SU85  | 21801 | 99.99  | 55.0±0.1  | 2.5 |
| SU86  | 23695 | 99.97  | 62.0±3.2  | 2.6 |
| SU87  | 30673 | 99.96  | 66.4±0.8  | 2.4 |
| SU88  | 22445 | 99.99  | 64.0±2.9  | 2.6 |
| SU98  | 25128 | 99.96  | 82.7±2.0  | 3.3 |
| SU99  | 22284 | 100.00 | 77.3±0.7  | 3.1 |
| SU100 | 22103 | 99.97  | 91.2±0.6  | 2.9 |
| SU101 | 22773 | 99.97  | 76.8±2.8  | 2.7 |
| SU102 | 24454 | 99.99  | 64.5±2.6  | 2.5 |
| SU103 | 22629 | 99.98  | 58.0±0.0  | 2.0 |
| SU107 | 21738 | 99.99  | 28.0±1.8  | 2.1 |
| SU108 | 22219 | 99.99  | 28.0±4.6  | 2.4 |
| SU109 | 20824 | 99.98  | 21.0±1.8  | 2.0 |
| SU110 | 23451 | 99.99  | 22.0±0.2  | 2.2 |
| SU111 | 23515 | 99.99  | 20.0±0.5  | 2.1 |
| SU112 | 24119 | 99.99  | 19.0±0.0  | 2.1 |
| SU118 | 21202 | 100.00 | 62.8±1.4  | 2.3 |
| SU119 | 21186 | 99.99  | 65.0±4.2  | 2.6 |
| SU120 | 20658 | 99.99  | 64.0±0.2  | 2.5 |
| SU121 | 22743 | 99.99  | 65.1±0.5  | 2.5 |
| SU122 | 34634 | 99.98  | 71.3±4.1  | 1.7 |
| SU123 | 22930 | 99.96  | 71.5±2.9  | 2.1 |
| SU126 | 21900 | 99.99  | 73.0±13.2 | 2.5 |
| SU130 | 21708 | 99.98  | 62.0±0.0  | 2.9 |
| SU131 | 22637 | 99.99  | 65.0±3.4  | 2.7 |
| SU132 | 22867 | 99.99  | 73.0±0.1  | 2.9 |
| SU133 | 22318 | 99.94  | 76.3±1.7  | 2.9 |
| SU134 | 23056 | 99.99  | 75.2±1.8  | 2.9 |
| SU135 | 21977 | 99.97  | 69.5±4.1  | 2.5 |
| SU136 | 23981 | 100.00 | 25.0±0.0  | 2.6 |
| SU138 | 21227 | 100.00 | 26.0±0.0  | 2.8 |
| SU139 | 22792 | 99.99  | 28.0±2.3  | 2.7 |
| SU140 | 21706 | 100.00 | 28.0±0.0  | 2.8 |
| SU141 | 21726 | 100.00 | 24.0±0.0  | 2.8 |
| SU142 | 24609 | 100.00 | 21.0±0.0  | 2.8 |
| SU147 | 24581 | 99.96  | 70.8±2.0  | 2.4 |
| SU148 | 23010 | 99.97  | 82.1±4.7  | 2.7 |
| SU150 | 27500 | 99.94  | 73.2±2.3  | 3.1 |
| SU151 | 24965 | 99.94  | 84.8±5.8  | 2.5 |
| SU152 | 21854 | 99.99  | 71.1±0.5  | 3.0 |
| SU153 | 22850 | 99.97  | 85.0±10.8 | 3.1 |
| SU157 | 23062 | 99.99  | 69.0±0.0  | 3.3 |
| SU158 | 26107 | 99.99  | 68.0±0.0  | 3.0 |
| SU159 | 20574 | 99.98  | 74.5±3.2  | 2.5 |

|       |       |        |           |     |
|-------|-------|--------|-----------|-----|
| SU160 | 21810 | 99.99  | 69.2±0.6  | 3.1 |
| SU161 | 21142 | 99.97  | 90.5±2.2  | 3.1 |
| SU166 | 21744 | 100.00 | 31.0±0.5  | 2.9 |
| SU169 | 21585 | 100.00 | 34.0±0.0  | 2.9 |
| SU172 | 21154 | 100.00 | 34.0±2.3  | 2.6 |
| SU175 | 21994 | 99.99  | 33.0±0.0  | 3.0 |
| SU177 | 22028 | 99.94  | 79.8±2.8  | 2.9 |
| SU179 | 20904 | 99.97  | 88.0±2.6  | 3.1 |
| SU180 | 23800 | 99.99  | 63.0±0.5  | 2.9 |
| SU182 | 22331 | 99.97  | 79.5±6.4  | 2.8 |
| SU183 | 23680 | 99.97  | 75.3±0.9  | 3.1 |
| SU184 | 20529 | 100.00 | 73.0±0.2  | 3.3 |
| SU186 | 21970 | 99.98  | 49.8±1.4  | 2.5 |
| SU187 | 22833 | 99.94  | 66.5±1.9  | 2.4 |
| SU188 | 22289 | 99.97  | 57.2±4.3  | 2.4 |
| SU189 | 23412 | 99.96  | 69.0±8.0  | 2.4 |
| SU190 | 21706 | 99.96  | 51.8±1.4  | 2.4 |
| SU192 | 31736 | 99.96  | 53.7±2.0  | 1.9 |
| SU193 | 20213 | 100.00 | 13.0±0.0  | 2.0 |
| SU194 | 20565 | 99.99  | 16.0±0.0  | 2.2 |
| SU195 | 20195 | 100.00 | 17.0±0.0  | 2.0 |
| SU196 | 23293 | 99.99  | 15.0±2.3  | 2.2 |
| SU198 | 21022 | 100.00 | 14.0±0.0  | 2.0 |
| SU199 | 20002 | 99.99  | 13.0±0.0  | 2.1 |
| SU200 | 25087 | 99.92  | 90.7±3.8  | 2.8 |
| SU201 | 25492 | 99.95  | 66.1±2.3  | 2.6 |
| SU202 | 15736 | 99.94  | 84.5±4.1  | 2.6 |
| SU203 | 23892 | 99.94  | 77.5±4.5  | 2.7 |
| SU204 | 15869 | 99.97  | 74.5±1.9  | 2.4 |
| SU207 | 22915 | 99.95  | 74.0±2.6  | 2.7 |
| SU208 | 21617 | 99.94  | 74.9±2.3  | 2.6 |
| SU209 | 22387 | 99.96  | 65.0±1.6  | 2.3 |
| SU210 | 20762 | 99.96  | 61.0±1.8  | 2.6 |
| SU211 | 21779 | 99.94  | 58.6±2.8  | 2.4 |
| SU212 | 20903 | 99.95  | 66.4±1.9  | 2.4 |
| SU215 | 25791 | 99.99  | 17.0±0.0  | 2.1 |
| SU216 | 25747 | 99.99  | 16.0±0.0  | 2.1 |
| SU217 | 22074 | 100.00 | 15.0±0.0  | 2.1 |
| SU218 | 22251 | 99.98  | 15.0±0.2  | 2.2 |
| SU219 | 21702 | 99.98  | 17.0±0.0  | 2.3 |
| SU222 | 42442 | 99.90  | 73.1±3.4  | 2.1 |
| SU224 | 20636 | 99.96  | 72.6±2.5  | 2.0 |
| SU225 | 21343 | 99.96  | 86.5±4.1  | 2.5 |
| SU226 | 28382 | 99.96  | 86.4±5.5  | 2.6 |
| SU227 | 21289 | 99.94  | 88.5±4.5  | 2.4 |
| SU229 | 26180 | 99.96  | 68.5±2.2  | 2.5 |
| SU230 | 25129 | 99.99  | 61.0±0.2  | 2.6 |
| SU231 | 33461 | 99.90  | 74.0±13.2 | 2.4 |
| SU232 | 21980 | 99.97  | 72.7±2.2  | 2.6 |

|       |       |        |           |     |
|-------|-------|--------|-----------|-----|
| SU233 | 22855 | 99.94  | 66.7±2.2  | 2.4 |
| SU234 | 20907 | 99.96  | 80.6±5.3  | 2.6 |
| SU236 | 26697 | 99.99  | 21.0±0.2  | 2.5 |
| SU237 | 23264 | 99.98  | 22.0±0.5  | 2.4 |
| SU238 | 28513 | 99.99  | 22.0±0.0  | 2.3 |
| SU239 | 26429 | 99.99  | 24.0±0.0  | 2.5 |
| SU240 | 21113 | 99.99  | 26.0±0.5  | 2.6 |
| SU241 | 26670 | 99.99  | 23.0±0.5  | 2.4 |
| SU243 | 22142 | 99.95  | 74.2±7.4  | 2.5 |
| SU244 | 21991 | 99.94  | 77.5±2.6  | 2.7 |
| SU246 | 24709 | 99.96  | 73.4±5.5  | 2.6 |
| SU247 | 24709 | 99.94  | 73.4±5.5  | 2.6 |
| SU248 | 22029 | 99.95  | 65.0±6.6  | 2.6 |
| SU250 | 22955 | 99.97  | 72.8±1.3  | 2.3 |
| SU251 | 20544 | 99.95  | 66.3±5.4  | 2.3 |
| SU252 | 20209 | 99.95  | 73.5±1.3  | 2.4 |
| SU253 | 22302 | 99.94  | 72.1±0.4  | 2.3 |
| SU254 | 21452 | 99.97  | 68.3±0.7  | 2.4 |
| SU255 | 21455 | 99.98  | 65.8±1.4  | 2.3 |
| SU257 | 27601 | 99.99  | 17.0±0.2  | 2.4 |
| SU258 | 28745 | 99.98  | 20.0±2.3  | 2.3 |
| SU259 | 28713 | 99.99  | 21.0±0.5  | 2.3 |
| SU260 | 28908 | 99.98  | 19.0±0.0  | 2.5 |
| SU261 | 25658 | 99.99  | 20.0±0.0  | 2.4 |
| SU262 | 25650 | 99.99  | 19.0±0.0  | 2.4 |
| SU264 | 27765 | 99.97  | 94.5±10.6 | 3.0 |
| SU265 | 17036 | 99.94  | 80.3±2.6  | 2.7 |
| SU266 | 21352 | 99.97  | 73.4±7.3  | 2.4 |
| SU267 | 18387 | 99.97  | 95.4±12.6 | 2.6 |
| SU268 | 23950 | 99.93  | 98.0±11.0 | 2.7 |
| SU269 | 25848 | 99.94  | 61.4±5.5  | 2.6 |
| SU271 | 31009 | 99.96  | 78.5±3.7  | 2.7 |
| SU272 | 27626 | 99.92  | 73.1±4.7  | 2.7 |
| SU273 | 30232 | 99.91  | 71.2±1.5  | 2.6 |
| SU274 | 29494 | 99.94  | 81.0±8.9  | 2.5 |
| SU275 | 29105 | 99.96  | 82.0±8.0  | 2.5 |
| SU276 | 25957 | 99.95  | 77.0±8.5  | 2.4 |
| SU278 | 30265 | 99.99  | 19.0±0.5  | 2.6 |
| SU279 | 28055 | 100.00 | 17.0±0.0  | 2.6 |
| SU280 | 32832 | 100.00 | 19.0±0.5  | 2.7 |
| SU281 | 29860 | 100.00 | 17.0±0.0  | 2.5 |
| SU282 | 33962 | 100.00 | 18.0±0.0  | 2.7 |
| SU285 | 25278 | 99.96  | 80.5±6.4  | 2.8 |
| SU286 | 15806 | 99.94  | 62.9±2.3  | 2.7 |
| SU287 | 25581 | 99.96  | 65.4±5.5  | 2.7 |
| SU288 | 28364 | 99.92  | 67.1±5.0  | 2.7 |
| SU292 | 33713 | 99.96  | 71.2±4.3  | 2.4 |
| SU293 | 26410 | 99.96  | 69.4±0.8  | 2.7 |
| SU294 | 27041 | 99.94  | 69.7±2.2  | 2.6 |

|       |       |        |          |     |
|-------|-------|--------|----------|-----|
| SU295 | 26558 | 99.94  | 76.3±0.7 | 2.6 |
| SU296 | 24790 | 99.94  | 68.2±0.5 | 2.6 |
| SU298 | 28246 | 99.92  | 81.1±7.2 | 2.6 |
| SU299 | 30218 | 100.00 | 19.0±0.0 | 2.6 |
| SU300 | 27367 | 99.99  | 21.0±0.0 | 2.6 |
| SU301 | 29303 | 99.99  | 22.0±0.5 | 2.6 |
| SU302 | 27560 | 100.00 | 21.0±0.0 | 2.7 |
| SU303 | 33656 | 100.00 | 22.0±0.0 | 2.7 |
| SU304 | 35567 | 100.00 | 21.0±0.0 | 2.6 |
| SU307 | 26928 | 99.96  | 68.5±6.6 | 2.6 |
| SU308 | 23409 | 99.94  | 64.1±4.6 | 2.7 |
| SU309 | 24066 | 99.97  | 82.2±7.4 | 2.8 |
| SU310 | 23826 | 99.94  | 62.4±1.9 | 2.7 |
| SU311 | 23429 | 99.96  | 65.9±2.3 | 2.7 |
| SU312 | 23247 | 99.96  | 64.0±3.4 | 2.7 |

**Table S4.** Fungal OTUs that were unique in each irrigation regime in the soil-plant compartments.

| Bulk soil                |                          |                           | Rhizosphere              |                          |                           | Root                    |                         |                         |
|--------------------------|--------------------------|---------------------------|--------------------------|--------------------------|---------------------------|-------------------------|-------------------------|-------------------------|
| SWD <sup>a</sup>         | MWD <sup>b</sup>         | AWD <sup>c</sup>          | SWD                      | MWD                      | AWD                       | SWD                     | MWD                     | AWD                     |
| <i>Alfaria</i>           | <i>Achaetomium</i>       | <i>Acrophialophora</i>    | <i>Bacillicladium</i>    | <i>Achroistachys</i>     | <i>Allomyces</i>          | <i>Achroistachys</i>    | <i>Absidia</i>          | <i>Campylocarpon</i>    |
| <i>Allomyces</i>         | <i>Achroistachys</i>     | <i>Alnicola</i>           | <i>Bolbitius</i>         | <i>Alfaria</i>           | <i>Coniolaria</i>         | <i>Allomyces</i>        | <i>Acaulospora</i>      | <i>Conocybe</i>         |
| <i>Arxiella</i>          | <i>Bolbitius</i>         | <i>Bacillicladium</i>     | <i>Burgoa</i>            | <i>Auxarthronopsis</i>   | <i>Echinusithea</i>       | <i>Ascotricha</i>       | <i>Achaetomium</i>      | <i>Cystobasidium</i>    |
| <i>Auxarthronopsis</i>   | <i>Echinusithea</i>      | <i>Candida</i>            | <i>Chordomyces</i>       | <i>Flavodon</i>          | <i>Geminibasidium</i>     | <i>Bolbitius</i>        | <i>Alfaria</i>          | <i>Gymnoascus</i>       |
| <i>Holtermanniella</i>   | <i>Fellomyces</i>        | <i>Colletotrichum</i>     | <i>Cladorrhinum</i>      | <i>Fumagopsis</i>        | <i>Hydnangium</i>         | <i>Bullera</i>          | <i>Alnicola</i>         | <i>Heteroradulum</i>    |
| <i>Hydnangium</i>        | <i>Kurtzmaniella</i>     | <i>Coprinus</i>           | <i>Cyberlindnera</i>     | <i>Fusicolla</i>         | <i>Parawiesneriomyces</i> | <i>Byssochlamys</i>     | <i>Anthracoecystis</i>  | <i>Holtermanniella</i>  |
| <i>Myriococcum</i>       | <i>Laetisaria</i>        | <i>Coralloidiomyces</i>   | <i>Diversispora</i>      | <i>Hormodochis</i>       | <i>Pezicula</i>           | <i>Calvatia</i>         | <i>Arachnotheca</i>     | <i>Hyaloseta</i>        |
| <i>Paecilomyces</i>      | <i>Lectera</i>           | <i>Diatrypella</i>        | <i>Entyloma</i>          | <i>Lobulomyces</i>       | <i>Sistotrema</i>         | <i>Chlorophyllum</i>    | <i>Arizonaphlyctis</i>  | <i>Ijuhya</i>           |
| <i>Pezicula</i>          | <i>Mucidula</i>          | <i>Drechmeria</i>         | <i>Harposporium</i>      | <i>Marasmius</i>         |                           | <i>Gymnascella</i>      | <i>Arthrocladium</i>    | <i>Laetisaria</i>       |
| <i>Phaeoannellomyces</i> | <i>Phialocephala</i>     | <i>Elsinoe</i>            | <i>Holtermanniella</i>   | <i>Melanoleuca</i>       |                           | <i>Hapsidospora</i>     | <i>Atractiella</i>      | <i>Leucoagaricus</i>    |
| <i>Phaeophlebiopsis</i>  | <i>Pseudophialophora</i> | <i>Hyphodontia</i>        | <i>Kurtzmaniella</i>     | <i>Mucidula</i>          |                           | <i>Hyalorbilia</i>      | <i>Auxarthronopsis</i>  | <i>Lindtneria</i>       |
| <i>Pluteus</i>           | <i>Remispora</i>         | <i>Kalmanozyma</i>        | <i>Laccaria</i>          | <i>Phaeoannellomyces</i> |                           | <i>Kraurogymnocarpa</i> | <i>Buckleyzyma</i>      | <i>Lipomyces</i>        |
| <i>Tulasnella</i>        | <i>Rhizophagus</i>       | <i>Laccaria</i>           | <i>Mycena</i>            | <i>Phialocephala</i>     |                           | <i>Lentithecium</i>     | <i>Classicula</i>       | <i>Lobulomyces</i>      |
|                          |                          | <i>Sistotrema</i>         | <i>Myriococcum</i>       | <i>Pleiocarpon</i>       |                           | <i>Metapochonia</i>     | <i>Climacocystis</i>    | <i>Marasmius</i>        |
|                          |                          | <i>Sporothrix</i>         | <i>Phylliscum</i>        | <i>Remispora</i>         |                           | <i>Minimelanolocus</i>  | <i>Coprinellus</i>      | <i>Matsushimaea</i>     |
|                          | <i>Sterigmatomyces</i>   | <i>Megasporoporia</i>     | <i>Pluteus</i>           | <i>Saccharomyces</i>     |                           | <i>Neoidriella</i>      | <i>Coralloidiomyces</i> | <i>Megasporoporia</i>   |
|                          | <i>Trametes</i>          | <i>Mycena</i>             | <i>Pseudophialophora</i> | <i>Thyronectria</i>      |                           | <i>Olpidium</i>         | <i>Currahmyces</i>      | <i>Meira</i>            |
|                          |                          | <i>Mycoleptodiscus</i>    | <i>Pseudothielavia</i>   |                          |                           | <i>Phaeoacremonium</i>  | <i>Cyberlindnera</i>    | <i>Microascus</i>       |
|                          |                          | <i>Neopaxillus</i>        | <i>Ramariopsis</i>       |                          |                           | <i>Phylliscum</i>       | <i>Debaryomyces</i>     | <i>Microthecium</i>     |
|                          |                          | <i>Parawiesneriomyces</i> | <i>Rhinocladia</i>       |                          |                           | <i>Spizellomyces</i>    | <i>Dimorphiseta</i>     | <i>Mucor</i>            |
|                          |                          | <i>Pleohelicon</i>        | <i>Rosasphaeria</i>      |                          |                           | <i>Synfenestella</i>    | <i>Eichleriella</i>     | <i>Papiliotrema</i>     |
|                          |                          | <i>Polytolypa</i>         | <i>Sporidiobolus</i>     |                          |                           |                         | <i>Elsinoe</i>          | <i>Phaeophlebiopsis</i> |
|                          |                          | <i>Ramariopsis</i>        | <i>Stagonospora</i>      |                          |                           |                         | <i>Epichloe</i>         | <i>Pluteus</i>          |
|                          |                          | <i>Saccharomyces</i>      | <i>Subulicystidium</i>   |                          |                           |                         | <i>Erythrobasidium</i>  | <i>Pochonia</i>         |
|                          |                          | <i>Sporisorium</i>        | <i>Synfenestella</i>     |                          |                           |                         | <i>Farysia</i>          | <i>Polycephalomyces</i> |
|                          |                          | <i>Taphrina</i>           | <i>Trichosporonaceae</i> |                          |                           |                         | <i>Geastrum</i>         | <i>Porpoloma</i>        |
|                          |                          | <i>Tilletiopsis</i>       | <i>Tulasnella</i>        |                          |                           |                         | <i>Gilbertella</i>      | <i>Pseudallescheria</i> |
|                          |                          | <i>Wojnowiciella</i>      | <i>Tygervalleyomyces</i> |                          |                           |                         | <i>Golubevia</i>        | <i>Pseudohyphozyma</i>  |
|                          |                          |                           | <i>Vaginatispora</i>     |                          |                           |                         | <i>Harposporium</i>     | <i>Pseudozyma</i>       |
|                          |                          |                           |                          |                          |                           |                         | <i>Lindtneria</i>       | <i>Psilocybe</i>        |
|                          |                          |                           |                          |                          |                           |                         | <i>Meyerozyma</i>       | <i>Rasamsonia</i>       |
|                          |                          |                           |                          |                          |                           |                         | <i>Microstroma</i>      | <i>Resupinatus</i>      |

|                          |                          |
|--------------------------|--------------------------|
| <i>Naganishia</i>        | <i>Rhizophagus</i>       |
| <i>Neostrelitziana</i>   | <i>Sampaiozyma</i>       |
| <i>Paecilomyces</i>      | <i>Scedosporium</i>      |
| <i>Peniophora</i>        | <i>Sistotremastrum</i>   |
| <i>Phialocephala</i>     | <i>Spiromastix</i>       |
| <i>Remispora</i>         | <i>Sporobolomyces</i>    |
| <i>Sporothrix</i>        | <i>Sterigmatomyces</i>   |
| <i>Tetracoccosporium</i> | <i>Striatibotrys</i>     |
| <i>Tulasnella</i>        | <i>Talaromyces</i>       |
| <i>Tulostoma</i>         | <i>Trematosphaeria</i>   |
| <i>Udeniozyma</i>        | <i>Trichomerium</i>      |
| <i>Vaginatisspora</i>    | <i>Trichosporonaceae</i> |
|                          | <i>Veronaea</i>          |
|                          | <i>Wallemia</i>          |
|                          | <i>Wojnowiciella</i>     |

---

<sup>a</sup> Severe Water Deficit

<sup>b</sup> Moderate Water Deficit

<sup>c</sup> Absence of Water Deficit

**Table S5.** SparCC correlation analysis at genus level in the bulk soil, rhizosphere and root.

| Bulk soil             |                         |             |         | Rhizosphere           |                       |             |         | Root                  |                         |             |         |
|-----------------------|-------------------------|-------------|---------|-----------------------|-----------------------|-------------|---------|-----------------------|-------------------------|-------------|---------|
| Taxon1                | Taxon2                  | Correlation | p-value | Taxon1                | Taxon2                | Correlation | p-value | Taxon1                | Taxon2                  | Correlation | p-value |
| <i>Acaulium</i>       | <i>Microthecium</i>     | 0.5704      | 0.0099  | <i>Absidia</i>        | <i>Clonostachys</i>   | 0.5493      | 0.0099  | <i>Aporpium</i>       | <i>Auricularia</i>      | 0.8039      | 0.0099  |
| <i>Acremonium</i>     | <i>Plectosphaerella</i> | 0.5569      | 0.0099  | <i>Aporpium</i>       | <i>Auricularia</i>    | 0.6864      | 0.0099  | <i>Aporpium</i>       | <i>Emericellopsis</i>   | 0.5153      | 0.0099  |
| <i>Albifimbria</i>    | <i>Aspergillus</i>      | 0.6357      | 0.0099  | <i>Aporpium</i>       | <i>Chrysosporium</i>  | -0.5182     | 0.0099  | <i>Aporpium</i>       | <i>Funneliformis</i>    | 0.7903      | 0.0099  |
| <i>Albifimbria</i>    | <i>Dissophora</i>       | 0.5247      | 0.0099  | <i>Aporpium</i>       | <i>Golubevia</i>      | -0.5347     | 0.0099  | <i>Aporpium</i>       | <i>Lasiobolidium</i>    | 0.5147      | 0.0099  |
| <i>Albifimbria</i>    | <i>Slopeiomyces</i>     | 0.5078      | 0.0099  | <i>Aporpium</i>       | <i>Polyscytalum</i>   | 0.5732      | 0.0099  | <i>Aporpium</i>       | <i>Polyscytalum</i>     | 0.695       | 0.0099  |
| <i>Albifimbria</i>    | <i>Solicoccozyma</i>    | 0.6486      | 0.0099  | <i>Aporpium</i>       | <i>Slopeiomyces</i>   | 0.5956      | 0.0099  | <i>Aspergillus</i>    | <i>Cirrenalia</i>       | -0.5248     | 0.0099  |
| <i>Albifimbria</i>    | <i>Spiromastix</i>      | -0.5157     | 0.0099  | <i>Aporpium</i>       | <i>Spiromastix</i>    | -0.7376     | 0.0099  | <i>Aspergillus</i>    | <i>Emericellopsis</i>   | -0.5029     | 0.0099  |
| <i>Aspergillus</i>    | <i>Albifimbria</i>      | 0.6357      | 0.0099  | <i>Auricularia</i>    | <i>Aporpium</i>       | 0.6864      | 0.0099  | <i>Aspergillus</i>    | <i>Fusarium</i>         | 0.6541      | 0.0099  |
| <i>Aspergillus</i>    | <i>Dissophora</i>       | 0.531       | 0.0099  | <i>Auricularia</i>    | <i>Cirrenalia</i>     | 0.549       | 0.0099  | <i>Aspergillus</i>    | <i>Malassezia</i>       | -0.5123     | 0.0099  |
| <i>Aspergillus</i>    | <i>Fusarium</i>         | 0.5694      | 0.0099  | <i>Auricularia</i>    | <i>Dactylonectria</i> | 0.5232      | 0.0099  | <i>Aspergillus</i>    | <i>Microdochium</i>     | -0.5006     | 0.0099  |
| <i>Calvatia</i>       | <i>Psathyrella</i>      | 0.5562      | 0.0099  | <i>Auricularia</i>    | <i>Enterocarpus</i>   | 0.55        | 0.0099  | <i>Aspergillus</i>    | <i>Minimedusa</i>       | 0.6593      | 0.0099  |
| <i>Ceratobasidium</i> | <i>Minimedusa</i>       | 0.5631      | 0.0099  | <i>Auricularia</i>    | <i>Golubevia</i>      | -0.5924     | 0.0099  | <i>Aspergillus</i>    | <i>Psathyrella</i>      | 0.6552      | 0.0099  |
| <i>Ceratobasidium</i> | <i>Scopulariopsis</i>   | 0.5053      | 0.0099  | <i>Auricularia</i>    | <i>Neocosmospora</i>  | 0.5914      | 0.0099  | <i>Aspergillus</i>    | <i>Thelonectria</i>     | 0.7568      | 0.0099  |
| <i>Ceratobasidium</i> | <i>Solicoccozyma</i>    | 0.5834      | 0.0099  | <i>Auricularia</i>    | <i>Polyscytalum</i>   | 0.6131      | 0.0099  | <i>Auricularia</i>    | <i>Aporpium</i>         | 0.8039      | 0.0099  |
| <i>Chrysosporium</i>  | <i>Enterocarpus</i>     | -0.5663     | 0.0099  | <i>Auricularia</i>    | <i>Slopeiomyces</i>   | 0.6751      | 0.0099  | <i>Auricularia</i>    | <i>Cirrenalia</i>       | 0.5246      | 0.0099  |
| <i>Chrysosporium</i>  | <i>Moesziomyces</i>     | 0.5425      | 0.0099  | <i>Auricularia</i>    | <i>Spiromastix</i>    | -0.7853     | 0.0099  | <i>Auricularia</i>    | <i>Emericellopsis</i>   | 0.6216      | 0.0099  |
| <i>Chrysosporium</i>  | <i>Slopeiomyces</i>     | -0.7904     | 0.0099  | <i>Auricularia</i>    | <i>Unknown</i>        | 0.557       | 0.0099  | <i>Auricularia</i>    | <i>Funneliformis</i>    | 0.8496      | 0.0099  |
| <i>Chrysosporium</i>  | <i>Spiromastix</i>      | 0.7599      | 0.0099  | <i>Buckleyzyma</i>    | <i>Occultifur</i>     | 0.5155      | 0.0099  | <i>Auricularia</i>    | <i>Polyscytalum</i>     | 0.5524      | 0.0099  |
| <i>Chrysosporium</i>  | <i>Spizellomyces</i>    | 0.6206      | 0.0099  | <i>Chrysosporium</i>  | <i>Aporpium</i>       | -0.5182     | 0.0099  | <i>Auricularia</i>    | <i>Thelonectria</i>     | -0.6497     | 0.0099  |
| <i>Cylindrocarpon</i> | <i>Slopeiomyces</i>     | -0.5264     | 0.0099  | <i>Chrysosporium</i>  | <i>Polyscytalum</i>   | -0.5673     | 0.0099  | <i>Bipolaris</i>      | <i>Cylindrocarpon</i>   | -0.5001     | 0.0099  |
| <i>Dissophora</i>     | <i>Albifimbria</i>      | 0.5247      | 0.0099  | <i>Chrysosporium</i>  | <i>Slopeiomyces</i>   | -0.5718     | 0.0099  | <i>Ceratobasidium</i> | <i>Plectosphaerella</i> | -0.5808     | 0.0099  |
| <i>Dissophora</i>     | <i>Aspergillus</i>      | 0.531       | 0.0099  | <i>Chrysosporium</i>  | <i>Spiromastix</i>    | 0.6547      | 0.0099  | <i>Cirrenalia</i>     | <i>Aspergillus</i>      | -0.5248     | 0.0099  |
| <i>Dissophora</i>     | <i>Enterocarpus</i>     | 0.5749      | 0.0099  | <i>Cirrenalia</i>     | <i>Auricularia</i>    | 0.549       | 0.0099  | <i>Cirrenalia</i>     | <i>Auricularia</i>      | 0.5246      | 0.0099  |
| <i>Dissophora</i>     | <i>Fusarium</i>         | 0.6267      | 0.0099  | <i>Cirrenalia</i>     | <i>Enterocarpus</i>   | 0.6174      | 0.0099  | <i>Cirrenalia</i>     | <i>Funneliformis</i>    | 0.5339      | 0.0099  |
| <i>Dissophora</i>     | <i>Lasiobolidium</i>    | 0.5665      | 0.0099  | <i>Cirrenalia</i>     | <i>Neocosmospora</i>  | 0.6008      | 0.0099  | <i>Cirrenalia</i>     | <i>Neocosmospora</i>    | -0.6248     | 0.0099  |
| <i>Enterocarpus</i>   | <i>Chrysosporium</i>    | -0.5663     | 0.0099  | <i>Cirrenalia</i>     | <i>Polyscytalum</i>   | 0.5706      | 0.0099  | <i>Cirrenalia</i>     | <i>Psathyrella</i>      | -0.5547     | 0.0099  |
| <i>Enterocarpus</i>   | <i>Dissophora</i>       | 0.5749      | 0.0099  | <i>Cirrenalia</i>     | <i>Slopeiomyces</i>   | 0.648       | 0.0099  | <i>Cylindrocarpon</i> | <i>Bipolaris</i>        | -0.5001     | 0.0099  |
| <i>Enterocarpus</i>   | <i>Fusarium</i>         | 0.5324      | 0.0099  | <i>Cirrenalia</i>     | <i>Spiromastix</i>    | -0.6191     | 0.0099  | <i>Cylindrocarpon</i> | <i>Dactylonectria</i>   | 0.529       | 0.0099  |
| <i>Enterocarpus</i>   | <i>Neocosmospora</i>    | 0.6053      | 0.0099  | <i>Cirrenalia</i>     | <i>Unknown</i>        | 0.5029      | 0.0099  | <i>Dactylonectria</i> | <i>Cylindrocarpon</i>   | 0.529       | 0.0099  |
| <i>Enterocarpus</i>   | <i>Slopeiomyces</i>     | 0.6792      | 0.0099  | <i>Clonostachys</i>   | <i>Absidia</i>        | 0.5493      | 0.0099  | <i>Dactylonectria</i> | <i>Thelonectria</i>     | 0.5102      | 0.0099  |
| <i>Enterocarpus</i>   | <i>Spiromastix</i>      | -0.6172     | 0.0099  | <i>Cylindrocarpon</i> | <i>Enterocarpus</i>   | 0.5825      | 0.0099  | <i>Dactylonectria</i> | <i>Trichoderma</i>      | 0.511       | 0.0099  |
| <i>Fusarium</i>       | <i>Aspergillus</i>      | 0.5694      | 0.0099  | <i>Cylindrocarpon</i> | <i>Fusarium</i>       | 0.5216      | 0.0099  | <i>Dissophora</i>     | <i>Malassezia</i>       | -0.6225     | 0.0099  |

|                         |                       |         |        |                       |                       |         |        |                       |                       |         |        |
|-------------------------|-----------------------|---------|--------|-----------------------|-----------------------|---------|--------|-----------------------|-----------------------|---------|--------|
| <i>Fusarium</i>         | <i>Dissophora</i>     | 0.6267  | 0.0099 | <i>Dactylonectria</i> | <i>Auricularia</i>    | 0.5232  | 0.0099 | <i>Dissophora</i>     | <i>Minimedusa</i>     | 0.6389  | 0.0099 |
| <i>Fusarium</i>         | <i>Enterocarpus</i>   | 0.5324  | 0.0099 | <i>Dactylonectria</i> | <i>Enterocarpus</i>   | 0.5245  | 0.0099 | <i>Dissophora</i>     | <i>Monosporascus</i>  | -0.5595 | 0.0099 |
| <i>Fusarium</i>         | <i>Lasiobolidium</i>  | 0.7815  | 0.0099 | <i>Dactylonectria</i> | <i>Neocosmospora</i>  | 0.6283  | 0.0099 | <i>Dissophora</i>     | <i>Psathyrella</i>    | 0.6333  | 0.0099 |
| <i>Fusarium</i>         | <i>Mortierella</i>    | 0.5663  | 0.0099 | <i>Dissophora</i>     | <i>Malassezia</i>     | 0.5006  | 0.0099 | <i>Emericellopsis</i> | <i>Aporpium</i>       | 0.5153  | 0.0099 |
| <i>Fusarium</i>         | <i>Slopeiomyces</i>   | 0.5507  | 0.0099 | <i>Enterocarpus</i>   | <i>Auricularia</i>    | 0.55    | 0.0099 | <i>Emericellopsis</i> | <i>Aspergillus</i>    | -0.5029 | 0.0099 |
| <i>Fusarium</i>         | <i>Solicoccozyma</i>  | 0.5769  | 0.0099 | <i>Enterocarpus</i>   | <i>Cirrenalia</i>     | 0.6174  | 0.0099 | <i>Emericellopsis</i> | <i>Auricularia</i>    | 0.6216  | 0.0099 |
| <i>Fusarium</i>         | <i>Spiromastix</i>    | -0.5423 | 0.0099 | <i>Enterocarpus</i>   | <i>Cylindrocarpon</i> | 0.5825  | 0.0099 | <i>Emericellopsis</i> | <i>Funneliformis</i>  | 0.6342  | 0.0099 |
| <i>Lasiobolidium</i>    | <i>Dissophora</i>     | 0.5665  | 0.0099 | <i>Enterocarpus</i>   | <i>Dactylonectria</i> | 0.5245  | 0.0099 | <i>Emericellopsis</i> | <i>Fusarium</i>       | -0.5976 | 0.0099 |
| <i>Lasiobolidium</i>    | <i>Fusarium</i>       | 0.7815  | 0.0099 | <i>Enterocarpus</i>   | <i>Neocosmospora</i>  | 0.6078  | 0.0099 | <i>Emericellopsis</i> | <i>Polyscytalum</i>   | 0.5661  | 0.0099 |
| <i>Lasiobolidium</i>    | <i>Spiromastix</i>    | -0.5251 | 0.0099 | <i>Enterocarpus</i>   | <i>Polyscytalum</i>   | 0.5502  | 0.0099 | <i>Emericellopsis</i> | <i>Thelonectria</i>   | -0.5674 | 0.0099 |
| <i>Microthecium</i>     | <i>Acaulium</i>       | 0.5704  | 0.0099 | <i>Enterocarpus</i>   | <i>Rhizophydium</i>   | -0.5521 | 0.0099 | <i>Funneliformis</i>  | <i>Aporpium</i>       | 0.7903  | 0.0099 |
| <i>Microthecium</i>     | <i>Solicoccozyma</i>  | -0.5104 | 0.0099 | <i>Enterocarpus</i>   | <i>Slopeiomyces</i>   | 0.6156  | 0.0099 | <i>Funneliformis</i>  | <i>Auricularia</i>    | 0.8496  | 0.0099 |
| <i>Microthecium</i>     | <i>Spencerozyma</i>   | 0.5266  | 0.0099 | <i>Enterocarpus</i>   | <i>Spiromastix</i>    | -0.5635 | 0.0099 | <i>Funneliformis</i>  | <i>Cirrenalia</i>     | 0.5339  | 0.0099 |
| <i>Minimedusa</i>       | <i>Ceratobasidium</i> | 0.5631  | 0.0099 | <i>Fusarium</i>       | <i>Cylindrocarpon</i> | 0.5216  | 0.0099 | <i>Funneliformis</i>  | <i>Emericellopsis</i> | 0.6342  | 0.0099 |
| <i>Minimedusa</i>       | <i>Solicoccozyma</i>  | 0.6639  | 0.0099 | <i>Golubevia</i>      | <i>Aporpium</i>       | -0.5347 | 0.0099 | <i>Funneliformis</i>  | <i>Polyscytalum</i>   | 0.5772  | 0.0099 |
| <i>Minimedusa</i>       | <i>Spiromastix</i>    | -0.5969 | 0.0099 | <i>Golubevia</i>      | <i>Auricularia</i>    | -0.5924 | 0.0099 | <i>Funneliformis</i>  | <i>Thelonectria</i>   | -0.539  | 0.0099 |
| <i>Moesziomyces</i>     | <i>Chrysosporium</i>  | 0.5425  | 0.0099 | <i>Golubevia</i>      | <i>Moesziomyces</i>   | 0.5495  | 0.0099 | <i>Fusarium</i>       | <i>Aspergillus</i>    | 0.6541  | 0.0099 |
| <i>Moesziomyces</i>     | <i>Pseudozyma</i>     | 0.5644  | 0.0099 | <i>Golubevia</i>      | <i>Polyscytalum</i>   | -0.5758 | 0.0099 | <i>Fusarium</i>       | <i>Emericellopsis</i> | -0.5976 | 0.0099 |
| <i>Moesziomyces</i>     | <i>Slopeiomyces</i>   | -0.5899 | 0.0099 | <i>Golubevia</i>      | <i>Slopeiomyces</i>   | -0.5766 | 0.0099 | <i>Fusarium</i>       | <i>Polyscytalum</i>   | -0.533  | 0.0099 |
| <i>Mortierella</i>      | <i>Fusarium</i>       | 0.5663  | 0.0099 | <i>Golubevia</i>      | <i>Spiromastix</i>    | 0.6808  | 0.0099 | <i>Fusarium</i>       | <i>Thelonectria</i>   | 0.912   | 0.0099 |
| <i>Mortierella</i>      | <i>Solicoccozyma</i>  | 0.5315  | 0.0099 | <i>Golubevia</i>      | <i>Spizellomyces</i>  | 0.5278  | 0.0099 | <i>Fusarium</i>       | <i>Verrucostoma</i>   | 0.5282  | 0.0099 |
| <i>Neocosmospora</i>    | <i>Enterocarpus</i>   | 0.6053  | 0.0099 | <i>Malassezia</i>     | <i>Dissophora</i>     | 0.5006  | 0.0099 | <i>Lasiobolidium</i>  | <i>Aporpium</i>       | 0.5147  | 0.0099 |
| <i>Neocosmospora</i>    | <i>Sodiomyces</i>     | 0.6406  | 0.0099 | <i>Microthecium</i>   | <i>Verrucostoma</i>   | 0.569   | 0.0099 | <i>Lasiobolidium</i>  | <i>Poaceascoma</i>    | -0.5526 | 0.0099 |
| <i>Nigrosabulum</i>     | <i>Thermoascus</i>    | 0.6     | 0.0099 | <i>Moesziomyces</i>   | <i>Golubevia</i>      | 0.5495  | 0.0099 | <i>Malassezia</i>     | <i>Aspergillus</i>    | -0.5123 | 0.0099 |
| <i>Olpidium</i>         | <i>Penicillium</i>    | 0.5207  | 0.0099 | <i>Moesziomyces</i>   | <i>Polyscytalum</i>   | -0.5165 | 0.0099 | <i>Malassezia</i>     | <i>Dissophora</i>     | -0.6225 | 0.0099 |
| <i>Penicillium</i>      | <i>Olpidium</i>       | 0.5207  | 0.0099 | <i>Moesziomyces</i>   | <i>Slopeiomyces</i>   | -0.5564 | 0.0099 | <i>Malassezia</i>     | <i>Minimedusa</i>     | -0.6099 | 0.0099 |
| <i>Plectosphaerella</i> | <i>Acremonium</i>     | 0.5569  | 0.0099 | <i>Moesziomyces</i>   | <i>Spiromastix</i>    | 0.6601  | 0.0099 | <i>Malassezia</i>     | <i>Psathyrella</i>    | -0.5497 | 0.0099 |
| <i>Psathyrella</i>      | <i>Calvatia</i>       | 0.5562  | 0.0099 | <i>Moesziomyces</i>   | <i>Spizellomyces</i>  | 0.5191  | 0.0099 | <i>Microdochium</i>   | <i>Aspergillus</i>    | -0.5006 | 0.0099 |
| <i>Psathyrella</i>      | <i>Spiromastix</i>    | 0.5421  | 0.0099 | <i>Neocosmospora</i>  | <i>Auricularia</i>    | 0.5914  | 0.0099 | <i>Minimedusa</i>     | <i>Aspergillus</i>    | 0.6593  | 0.0099 |
| <i>Psathyrella</i>      | <i>Trichoderma</i>    | 0.5924  | 0.0099 | <i>Neocosmospora</i>  | <i>Cirrenalia</i>     | 0.6008  | 0.0099 | <i>Minimedusa</i>     | <i>Dissophora</i>     | 0.6389  | 0.0099 |
| <i>Pseudozyma</i>       | <i>Moesziomyces</i>   | 0.5644  | 0.0099 | <i>Neocosmospora</i>  | <i>Dactylonectria</i> | 0.6283  | 0.0099 | <i>Minimedusa</i>     | <i>Malassezia</i>     | -0.6099 | 0.0099 |
| <i>Scopulariopsis</i>   | <i>Ceratobasidium</i> | 0.5053  | 0.0099 | <i>Neocosmospora</i>  | <i>Enterocarpus</i>   | 0.6078  | 0.0099 | <i>Minimedusa</i>     | <i>Mortierella</i>    | 0.5438  | 0.0099 |
| <i>Slopeiomyces</i>     | <i>Albifimbria</i>    | 0.5078  | 0.0099 | <i>Neocosmospora</i>  | <i>Polyscytalum</i>   | 0.6054  | 0.0099 | <i>Minimedusa</i>     | <i>Psathyrella</i>    | 0.7953  | 0.0099 |
| <i>Slopeiomyces</i>     | <i>Chrysosporium</i>  | -0.7904 | 0.0099 | <i>Neocosmospora</i>  | <i>Slopeiomyces</i>   | 0.7164  | 0.0099 | <i>Monosporascus</i>  | <i>Dissophora</i>     | -0.5595 | 0.0099 |
| <i>Slopeiomyces</i>     | <i>Cylindrocarpon</i> | -0.5264 | 0.0099 | <i>Neocosmospora</i>  | <i>Spiromastix</i>    | -0.7184 | 0.0099 | <i>Monosporascus</i>  | <i>Phomatospora</i>   | 0.5714  | 0.0099 |
| <i>Slopeiomyces</i>     | <i>Enterocarpus</i>   | 0.6792  | 0.0099 | <i>Occultifur</i>     | <i>Buckleyzyma</i>    | 0.5155  | 0.0099 | <i>Mortierella</i>    | <i>Minimedusa</i>     | 0.5438  | 0.0099 |

|                      |                       |         |        |                      |                      |         |        |                         |                         |         |        |
|----------------------|-----------------------|---------|--------|----------------------|----------------------|---------|--------|-------------------------|-------------------------|---------|--------|
| <i>Slopeiomyces</i>  | <i>Fusarium</i>       | 0.5507  | 0.0099 | <i>Polyscytalum</i>  | <i>Aporpium</i>      | 0.5732  | 0.0099 | <i>Neocosmospora</i>    | <i>Cirrenalia</i>       | -0.6248 | 0.0099 |
| <i>Slopeiomyces</i>  | <i>Moesziomyces</i>   | -0.5899 | 0.0099 | <i>Polyscytalum</i>  | <i>Auricularia</i>   | 0.6131  | 0.0099 | <i>Neocosmospora</i>    | <i>Psathyrella</i>      | 0.6049  | 0.0099 |
| <i>Slopeiomyces</i>  | <i>Spiromastix</i>    | -0.8402 | 0.0099 | <i>Polyscytalum</i>  | <i>Chrysosporium</i> | -0.5673 | 0.0099 | <i>Penicillium</i>      | <i>Polyscytalum</i>     | -0.5458 | 0.0099 |
| <i>Slopeiomyces</i>  | <i>Spizellomyces</i>  | -0.6129 | 0.0099 | <i>Polyscytalum</i>  | <i>Cirrenalia</i>    | 0.5706  | 0.0099 | <i>Penicillium</i>      | <i>Spencerozyma</i>     | 0.5152  | 0.0099 |
| <i>Sodiomyces</i>    | <i>Neocosmospora</i>  | 0.6406  | 0.0099 | <i>Polyscytalum</i>  | <i>Enterocarpus</i>  | 0.5502  | 0.0099 | <i>Phomatospora</i>     | <i>Monosporascus</i>    | 0.5714  | 0.0099 |
| <i>Solicoccozyma</i> | <i>Albifimbria</i>    | 0.6486  | 0.0099 | <i>Polyscytalum</i>  | <i>Golubevia</i>     | -0.5758 | 0.0099 | <i>Plectosphaerella</i> | <i>Ceratobasidium</i>   | -0.5808 | 0.0099 |
| <i>Solicoccozyma</i> | <i>Ceratobasidium</i> | 0.5834  | 0.0099 | <i>Polyscytalum</i>  | <i>Moesziomyces</i>  | -0.5165 | 0.0099 | <i>Plectosphaerella</i> | <i>Spencerozyma</i>     | 0.5703  | 0.0099 |
| <i>Solicoccozyma</i> | <i>Fusarium</i>       | 0.5769  | 0.0099 | <i>Polyscytalum</i>  | <i>Neocosmospora</i> | 0.6054  | 0.0099 | <i>Plectosphaerella</i> | <i>Spiromastix</i>      | 0.6269  | 0.0099 |
| <i>Solicoccozyma</i> | <i>Microthecium</i>   | -0.5104 | 0.0099 | <i>Polyscytalum</i>  | <i>Slopeiomyces</i>  | 0.8008  | 0.0099 | <i>Poaceascoma</i>      | <i>Lasiobolidium</i>    | -0.5526 | 0.0099 |
| <i>Solicoccozyma</i> | <i>Minimedusa</i>     | 0.6639  | 0.0099 | <i>Polyscytalum</i>  | <i>Spiromastix</i>   | -0.834  | 0.0099 | <i>Poaceascoma</i>      | <i>Spencerozyma</i>     | 0.7259  | 0.0099 |
| <i>Solicoccozyma</i> | <i>Mortierella</i>    | 0.5315  | 0.0099 | <i>Rhizophydium</i>  | <i>Enterocarpus</i>  | -0.5521 | 0.0099 | <i>Poaceascoma</i>      | <i>Spiromastix</i>      | 0.7905  | 0.0099 |
| <i>Solicoccozyma</i> | <i>Spencerozyma</i>   | -0.7287 | 0.0099 | <i>Rhizophydium</i>  | <i>Spiromastix</i>   | 0.5392  | 0.0099 | <i>Polyscytalum</i>     | <i>Aporpium</i>         | 0.695   | 0.0099 |
| <i>Solicoccozyma</i> | <i>Spiromastix</i>    | -0.5835 | 0.0099 | <i>Slopeiomyces</i>  | <i>Aporpium</i>      | 0.5956  | 0.0099 | <i>Polyscytalum</i>     | <i>Auricularia</i>      | 0.5524  | 0.0099 |
| <i>Solicoccozyma</i> | <i>Unknown</i>        | 0.5399  | 0.0099 | <i>Slopeiomyces</i>  | <i>Auricularia</i>   | 0.6751  | 0.0099 | <i>Polyscytalum</i>     | <i>Emericellopsis</i>   | 0.5661  | 0.0099 |
| <i>Spencerozyma</i>  | <i>Microthecium</i>   | 0.5266  | 0.0099 | <i>Slopeiomyces</i>  | <i>Chrysosporium</i> | -0.5718 | 0.0099 | <i>Polyscytalum</i>     | <i>Funneliformis</i>    | 0.5772  | 0.0099 |
| <i>Spencerozyma</i>  | <i>Solicoccozyma</i>  | -0.7287 | 0.0099 | <i>Slopeiomyces</i>  | <i>Cirrenalia</i>    | 0.648   | 0.0099 | <i>Polyscytalum</i>     | <i>Fusarium</i>         | -0.533  | 0.0099 |
| <i>Spiromastix</i>   | <i>Albifimbria</i>    | -0.5157 | 0.0099 | <i>Slopeiomyces</i>  | <i>Enterocarpus</i>  | 0.6156  | 0.0099 | <i>Polyscytalum</i>     | <i>Penicillium</i>      | -0.5458 | 0.0099 |
| <i>Spiromastix</i>   | <i>Chrysosporium</i>  | 0.7599  | 0.0099 | <i>Slopeiomyces</i>  | <i>Golubevia</i>     | -0.5766 | 0.0099 | <i>Psathyrella</i>      | <i>Aspergillus</i>      | 0.6552  | 0.0099 |
| <i>Spiromastix</i>   | <i>Enterocarpus</i>   | -0.6172 | 0.0099 | <i>Slopeiomyces</i>  | <i>Moesziomyces</i>  | -0.5564 | 0.0099 | <i>Psathyrella</i>      | <i>Cirrenalia</i>       | -0.5547 | 0.0099 |
| <i>Spiromastix</i>   | <i>Fusarium</i>       | -0.5423 | 0.0099 | <i>Slopeiomyces</i>  | <i>Neocosmospora</i> | 0.7164  | 0.0099 | <i>Psathyrella</i>      | <i>Dissophora</i>       | 0.6333  | 0.0099 |
| <i>Spiromastix</i>   | <i>Lasiobolidium</i>  | -0.5251 | 0.0099 | <i>Slopeiomyces</i>  | <i>Polyscytalum</i>  | 0.8008  | 0.0099 | <i>Psathyrella</i>      | <i>Malassezia</i>       | -0.5497 | 0.0099 |
| <i>Spiromastix</i>   | <i>Minimedusa</i>     | -0.5969 | 0.0099 | <i>Slopeiomyces</i>  | <i>Spiromastix</i>   | -0.8649 | 0.0099 | <i>Psathyrella</i>      | <i>Minimedusa</i>       | 0.7953  | 0.0099 |
| <i>Spiromastix</i>   | <i>Psathyrella</i>    | 0.5421  | 0.0099 | <i>Slopeiomyces</i>  | <i>Unknown</i>       | 0.5563  | 0.0099 | <i>Psathyrella</i>      | <i>Neocosmospora</i>    | 0.6049  | 0.0099 |
| <i>Spiromastix</i>   | <i>Slopeiomyces</i>   | -0.8402 | 0.0099 | <i>Sodiomyces</i>    | <i>Spiromastix</i>   | -0.5354 | 0.0099 | <i>Psathyrella</i>      | <i>Thelonectria</i>     | 0.5504  | 0.0099 |
| <i>Spiromastix</i>   | <i>Solicoccozyma</i>  | -0.5835 | 0.0099 | <i>Solicoccozyma</i> | <i>Spencerozyma</i>  | -0.8005 | 0.0099 | <i>Sarocladium</i>      | <i>Spencerozyma</i>     | 0.5688  | 0.0099 |
| <i>Spiromastix</i>   | <i>Spizellomyces</i>  | 0.5924  | 0.0099 | <i>Solicoccozyma</i> | <i>Spiromastix</i>   | -0.5319 | 0.0099 | <i>Spencerozyma</i>     | <i>Penicillium</i>      | 0.5152  | 0.0099 |
| <i>Spiromastix</i>   | <i>Thelonectria</i>   | 0.588   | 0.0099 | <i>Spencerozyma</i>  | <i>Solicoccozyma</i> | -0.8005 | 0.0099 | <i>Spencerozyma</i>     | <i>Plectosphaerella</i> | 0.5703  | 0.0099 |
| <i>Spizellomyces</i> | <i>Chrysosporium</i>  | 0.6206  | 0.0099 | <i>Spiromastix</i>   | <i>Aporpium</i>      | -0.7376 | 0.0099 | <i>Spencerozyma</i>     | <i>Poaceascoma</i>      | 0.7259  | 0.0099 |
| <i>Spizellomyces</i> | <i>Slopeiomyces</i>   | -0.6129 | 0.0099 | <i>Spiromastix</i>   | <i>Auricularia</i>   | -0.7853 | 0.0099 | <i>Spencerozyma</i>     | <i>Sarocladium</i>      | 0.5688  | 0.0099 |
| <i>Spizellomyces</i> | <i>Spiromastix</i>    | 0.5924  | 0.0099 | <i>Spiromastix</i>   | <i>Chrysosporium</i> | 0.6547  | 0.0099 | <i>Spencerozyma</i>     | <i>Spiromastix</i>      | 0.8837  | 0.0099 |
| <i>Thelonectria</i>  | <i>Spiromastix</i>    | 0.588   | 0.0099 | <i>Spiromastix</i>   | <i>Cirrenalia</i>    | -0.6191 | 0.0099 | <i>Spiromastix</i>      | <i>Plectosphaerella</i> | 0.6269  | 0.0099 |
| <i>Thermoascus</i>   | <i>Nigrosabulum</i>   | 0.6     | 0.0099 | <i>Spiromastix</i>   | <i>Enterocarpus</i>  | -0.5635 | 0.0099 | <i>Spiromastix</i>      | <i>Poaceascoma</i>      | 0.7905  | 0.0099 |
| <i>Trichoderma</i>   | <i>Psathyrella</i>    | 0.5924  | 0.0099 | <i>Spiromastix</i>   | <i>Golubevia</i>     | 0.6808  | 0.0099 | <i>Spiromastix</i>      | <i>Spencerozyma</i>     | 0.8837  | 0.0099 |
| <i>Unknown</i>       | <i>Solicoccozyma</i>  | 0.5399  | 0.0099 | <i>Spiromastix</i>   | <i>Moesziomyces</i>  | 0.6601  | 0.0099 | <i>Thelonectria</i>     | <i>Aspergillus</i>      | 0.7568  | 0.0099 |
|                      |                       |         |        | <i>Spiromastix</i>   | <i>Neocosmospora</i> | -0.7184 | 0.0099 | <i>Thelonectria</i>     | <i>Auricularia</i>      | -0.6497 | 0.0099 |
|                      |                       |         |        | <i>Spiromastix</i>   | <i>Polyscytalum</i>  | -0.834  | 0.0099 | <i>Thelonectria</i>     | <i>Dactylonectria</i>   | 0.5102  | 0.0099 |

|                      |                      |         |        |                     |                       |         |        |
|----------------------|----------------------|---------|--------|---------------------|-----------------------|---------|--------|
| <i>Spiromastix</i>   | <i>Rhizophydium</i>  | 0.5392  | 0.0099 | <i>Thelonectria</i> | <i>Emericellopsis</i> | -0.5674 | 0.0099 |
| <i>Spiromastix</i>   | <i>Slopeiomyces</i>  | -0.8649 | 0.0099 | <i>Thelonectria</i> | <i>Funneliformis</i>  | -0.539  | 0.0099 |
| <i>Spiromastix</i>   | <i>Sodiomyces</i>    | -0.5354 | 0.0099 | <i>Thelonectria</i> | <i>Fusarium</i>       | 0.912   | 0.0099 |
| <i>Spiromastix</i>   | <i>Solicoccozyma</i> | -0.5319 | 0.0099 | <i>Thelonectria</i> | <i>Psathyrella</i>    | 0.5504  | 0.0099 |
| <i>Spiromastix</i>   | <i>Unknown</i>       | -0.5216 | 0.0099 | <i>Thelonectria</i> | <i>Verrucostoma</i>   | 0.6075  | 0.0099 |
| <i>Spizellomyces</i> | <i>Golubevia</i>     | 0.5278  | 0.0099 | <i>Trichoderma</i>  | <i>Dactylonectria</i> | 0.511   | 0.0099 |
| <i>Spizellomyces</i> | <i>Moesziomyces</i>  | 0.5191  | 0.0099 | <i>Verrucostoma</i> | <i>Fusarium</i>       | 0.5282  | 0.0099 |
| <i>Unknown</i>       | <i>Auricularia</i>   | 0.557   | 0.0099 | <i>Verrucostoma</i> | <i>Thelonectria</i>   | 0.6075  | 0.0099 |
| <i>Unknown</i>       | <i>Cirrenalia</i>    | 0.5029  | 0.0099 |                     |                       |         |        |
| <i>Unknown</i>       | <i>Slopeiomyces</i>  | 0.5563  | 0.0099 |                     |                       |         |        |
| <i>Unknown</i>       | <i>Spiromastix</i>   | -0.5216 | 0.0099 |                     |                       |         |        |
| <i>Verrucostoma</i>  | <i>Microthecium</i>  | 0.569   | 0.0099 |                     |                       |         |        |

**Table S6.** Relative proportion (%) of fungal function from soil-plant compartments at each irrigation regime inferred by FunGuild.

|             | SWD <sup>a</sup> | Bulk soil<br>MWD <sup>b</sup> | AWD <sup>c</sup> | SWD           | Rhizosphere<br>MWD | AWD           | SWD            | Root<br>MWD   | AWD            |
|-------------|------------------|-------------------------------|------------------|---------------|--------------------|---------------|----------------|---------------|----------------|
| Pathotroph  | 24.52±0.67 Ba    | 26.13±1.35 Ba                 | 23.62±3.08 Ba    | 27.79±3.22 Ba | 24.20±0.98 Ba      | 23.97±1.03 Ba | 26.25±3.29 Bb  | 34.50±0.92 Ba | 28.41±0.52 Bab |
| Saprotroph  | 44.96±1.97 Aa    | 42.27±0.52 Aa                 | 46.50±2.57 Aa    | 45.63±1.91 Aa | 45.16±2.87 Aa      | 47.87±2.42Aa  | 52.28±5.07 Aa  | 41.51±1.34 Aa | 45.22±2.14 Aa  |
| Symbiotroph | 25.37±1.94 Ba    | 24.50±0.73 Ba                 | 22.11±1.49 Ba    | 22.21±2.57 Ba | 23.38±3.07 Ba      | 20.32±2.12 Ba | 17.48±2.23 BCa | 20.17±0.51 Ca | 16.98±2.14 Ca  |
| Unassigned  | 5.16±0.74 Ca     | 7.10±1.06 Ca                  | 7.77±1.91 Ca     | 4.37±0.31 Cb  | 7.26±1.22 Cab      | 7.85±0.74 Ca  | 3.98±0.37 Ca   | 3.81±0.39 Da  | 9.38±1.60 Ca   |

<sup>a</sup> Severe Water Deficit

<sup>b</sup> Moderate Water Deficit

<sup>c</sup> Absence of Water Deficit

Tukey's test at  $P < 0.05$  level. Means followed by the same letter do not differ significantly ( $P < 0.05$ ). Capital letters are for comparison of means among functional groups within each irrigation regime. Small letters are for comparison of means among irrigation regimes within each functional group.

**Table S7.** Compositions and relative abundance (%) of fungal functional groups (guild) inferred by FunGuild.

|             |                        | Bulk soil        |                  |                  | Rhizosphere |          |           | Root      |          |          |
|-------------|------------------------|------------------|------------------|------------------|-------------|----------|-----------|-----------|----------|----------|
|             |                        | SWD <sup>a</sup> | MDW <sup>b</sup> | AWD <sup>c</sup> | SWD         | MWD      | AWD       | SWD       | MWD      | AWD      |
| Pathotroph  | Plant Pathogen         | 8.02 Aa          | 10.21 Aa         | 7.57 Aa          | 15.79 Aa    | 15.28 Aa | 12.77 Aa  | 17.49 Aab | 20.27 Aa | 11.94 Ab |
|             | Animal Pathogen        | 6.81 Aa          | 6.37 ABa         | 7.49 Aa          | 4.44 Ba     | 4.21 Ba  | 5.72 Ba   | 3.80 Ba   | 5.71 Ba  | 7.90 Ba  |
|             | Fungal Parasite        | 3.34 Ba          | 3.59 Ba          | 3.49 Aa          | 2.32 Ba     | 0.82 Ca  | 1.07 Ca   | 1.58 Ba   | 3.99 Ba  | 3.32 Da  |
|             | Lichen Parasite        | 6.35 Aa          | 5.95 ABa         | 5.07 Aa          | 5.25 Ba     | 3.89 Ba  | 4.42 Ba   | 3.39 Ba   | 4.54 Ba  | 5.24 Ca  |
| Saprotroph  | Soil Saprotroph        | 13.56 Ba         | 10.32 Ba         | 12.15 Ba         | 11.21 Ba    | 8.70 Ba  | 9.80 Ba   | 4.23 Ba   | 6.10 Ba  | 8.50 Ba  |
|             | Wood Saprotroph        | 7.41 Ca          | 8.82 Ba          | 8.50 Ba          | 7.42 BCa    | 5.34 BCb | 10.16 Bab | 10.93 ABa | 8.63 Ba  | 10.22 Ba |
|             | Dung Saprotroph        | 2.28 Da          | 2.90 Da          | 1.43 Da          | 3.27 Ca     | 4.60 BCa | 3.63 Ca   | 6.15 Ba   | 1.56 Cb  | 3.14 Cab |
|             | Plant Saprotroph       | 2.37 Db          | 2.62 Ca          | 3.77 Ca          | 3.29 Ca     | 1.86 Ca  | 2.64 Ca   | 3.01 Ba   | 6.44 Ba  | 5.04 Ca  |
| Symbiotroph | Undefined Saprotroph   | 19.34 Aa         | 17.60 Aa         | 20.65 Aa         | 20.44 Aa    | 24.66 Aa | 21.64 Aa  | 27.97 Aa  | 18.77 Aa | 18.33 Aa |
|             | Endophyte              | 21.24 Aa         | 19.44 Aa         | 20.68 Aa         | 16.31 Aa    | 14.82 Aa | 16.17 Aa  | 7.74 Aa   | 9.79 Aa  | 15.25 Aa |
|             | Arbuscular Mycorrhizal | 4.12 Ba          | 5.05 Ba          | 1.43 Ba          | 5.89 Ba     | 8.56 Ba  | 4.15 Ba   | 9.74 Aa   | 10.38 Aa | 1.74 Ab  |
| Unassigned  |                        | 5.16 a           | 7.10 a           | 7.77 a           | 4.37 b      | 7.26 ab  | 7.85 a    | 3.99 a    | 3.82 a   | 9.38 a   |

<sup>a</sup> Severe Water Deficit<sup>b</sup> Moderate Water Deficit<sup>c</sup> Absence of Water Deficit

Tukey's test at  $P < 0.05$  level. Means followed by the same letter do not differ significantly ( $P < 0.05$ ). Capital letters are for comparisons of means of functional groups within each trophic mode, irrigation regime and soil-plant compartment. Small letters are for comparison of means of each functional group among irrigation regimes within each soil-plant compartment.

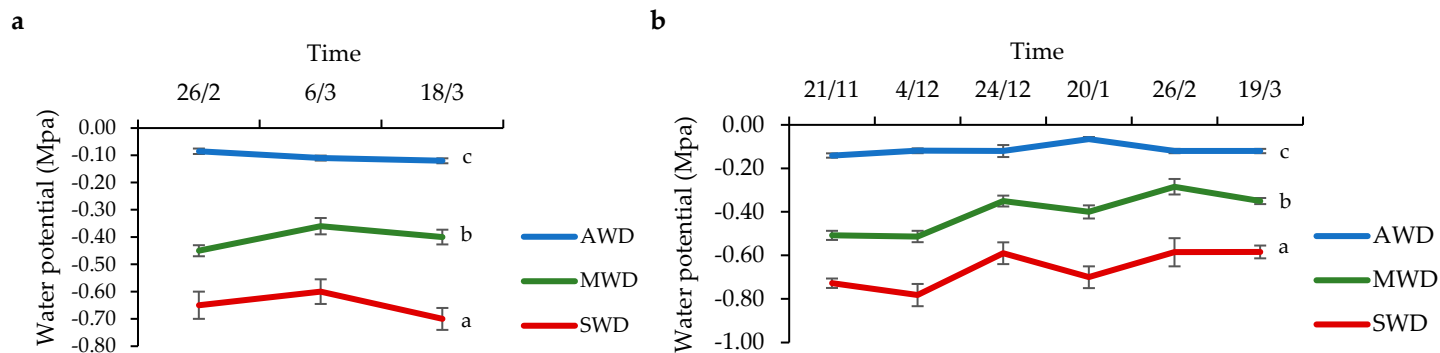

**Figure S1.** Predawn leaf water potential at the irrigation regimes. Absence of water deficit (AWD), moderate water deficit (MWD) and severe water deficit (SWD). (a) Growing season 2018-2019 and (b) 2019-2020. Tukey's test at  $p$ -value  $< 0.05$  level. Means followed by the same letter do not differ significantly.

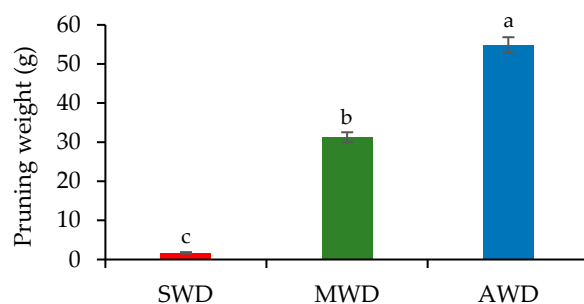

**Figure S2.** Pruning weight at the irrigation regimes. Absence of water deficit (AWD), moderate water deficit (MWD) and severe water deficit (SWD). Pruning made in winter 2020. Tukey's test at  $p$ -value  $< 0.05$  level. Means followed by the same letter do not differ significantly.

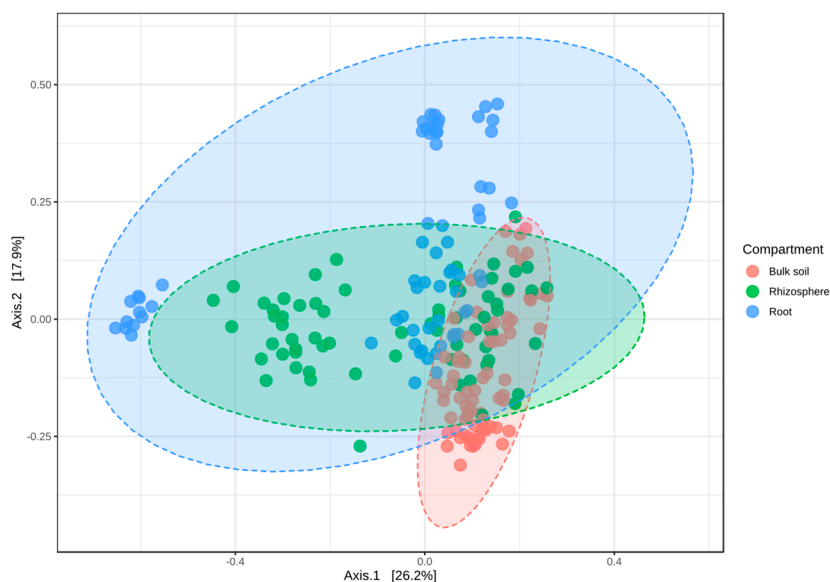

**Figure S3.** Principal Coordinate Analysis (PCoA) based on Bray Curtis dissimilarity metrics, showing the distance in the fungal communities among soil-plant compartments.

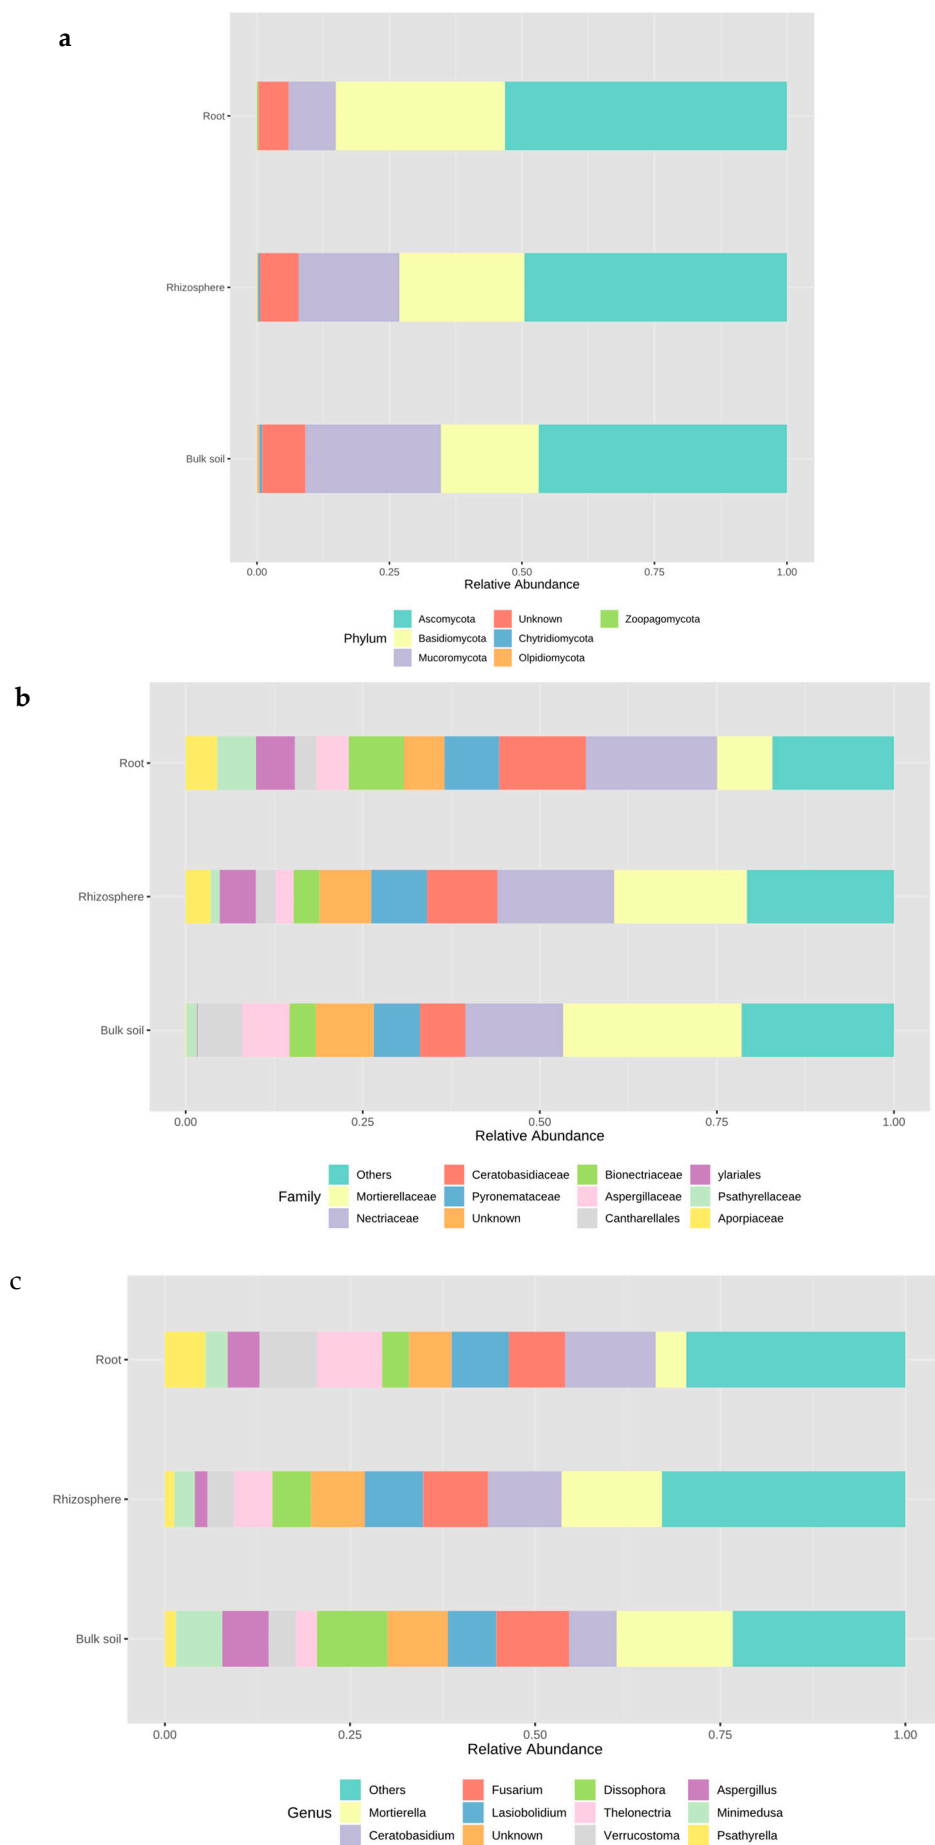

**Figure S4.** Relative abundance of the most abundant (a) phyla, (b) families and (c) genera in bulk-soil, rhizosphere and root samples

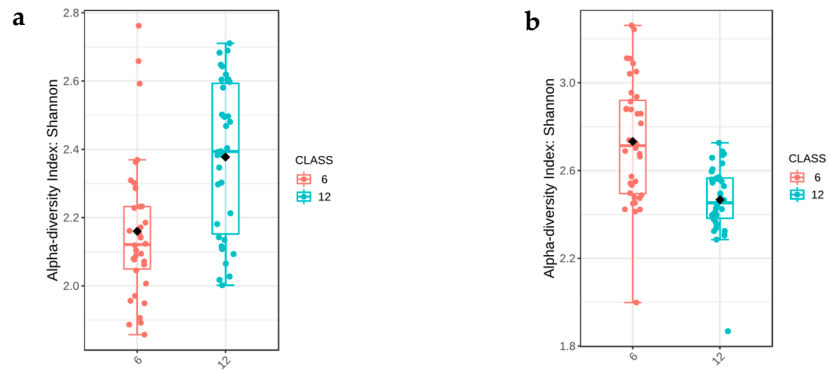

**Figure S5.** Boxplot illustrating the differences in Shannon diversity measure of the fungal communities in (a) root and (b) bulk soil between 6- and 12-month sampling time.

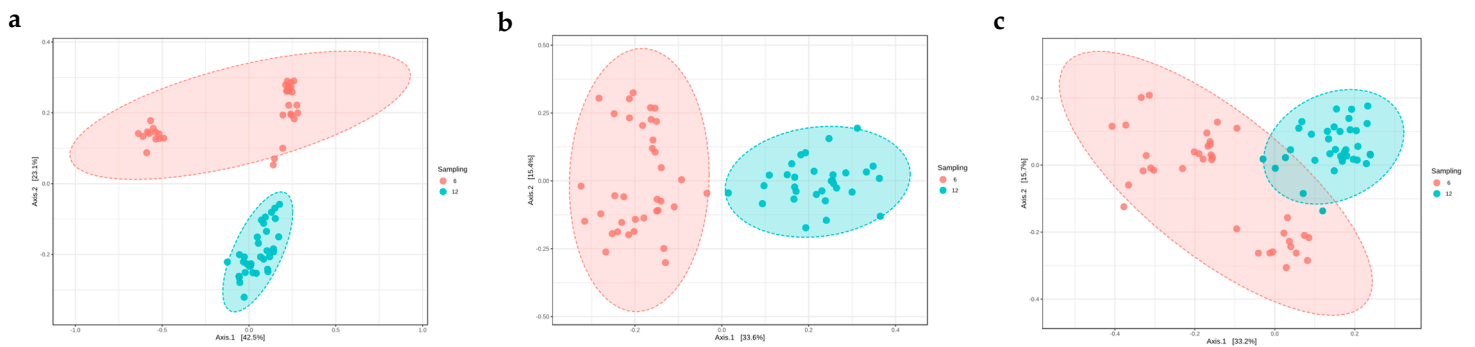

**Figure S6.** Principal Coordinate Analysis (PCoA) based on Bray Curtis dissimilarity metrics, showing the distance in the fungal communities in (a) root, (b) rhizosphere and (c) bulk soil between 6- and 12-month sampling time.

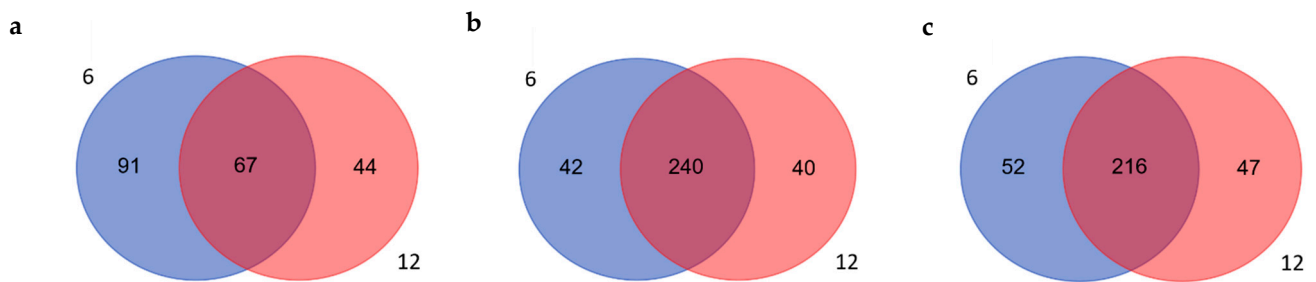

**Figure S7.** Venn diagram illustrating the overlap of the OTUs identified in the fungal microbiota between 6- and 12-month sampling time in the (a) root, (b) rhizosphere and (c) bulk-soil.

a

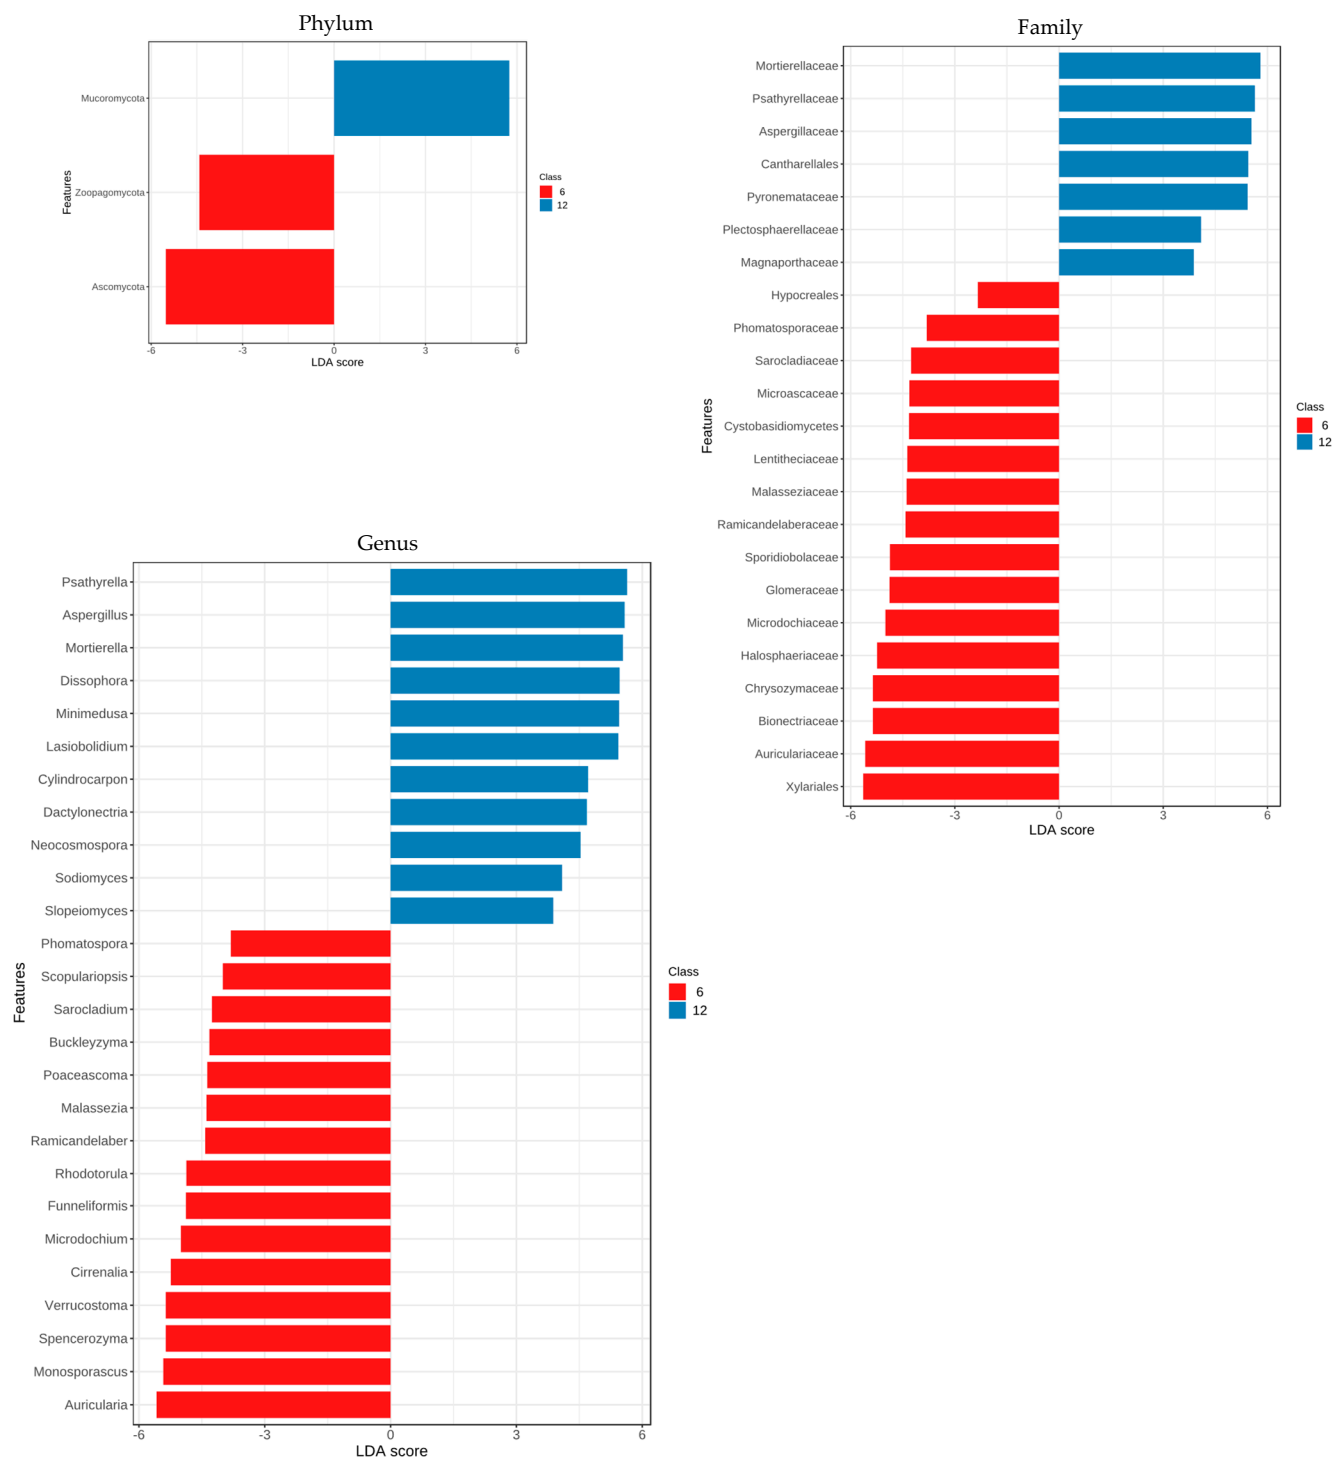

b

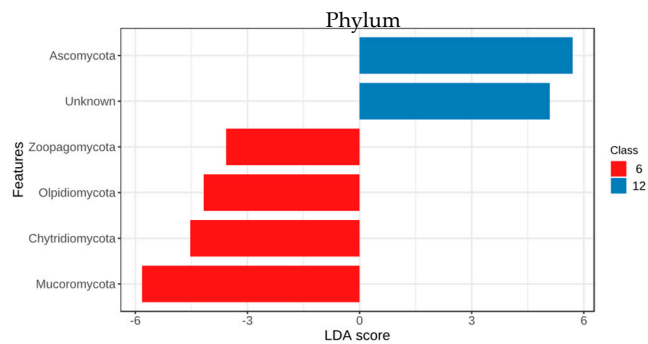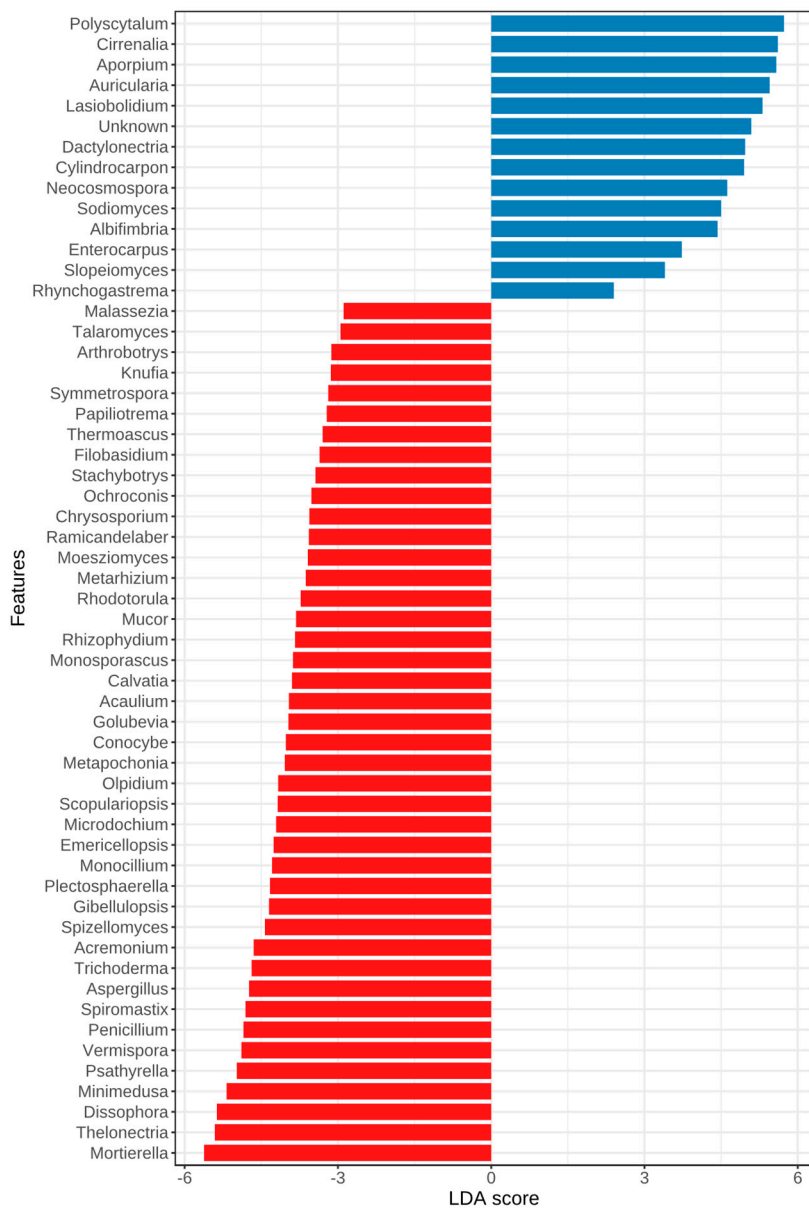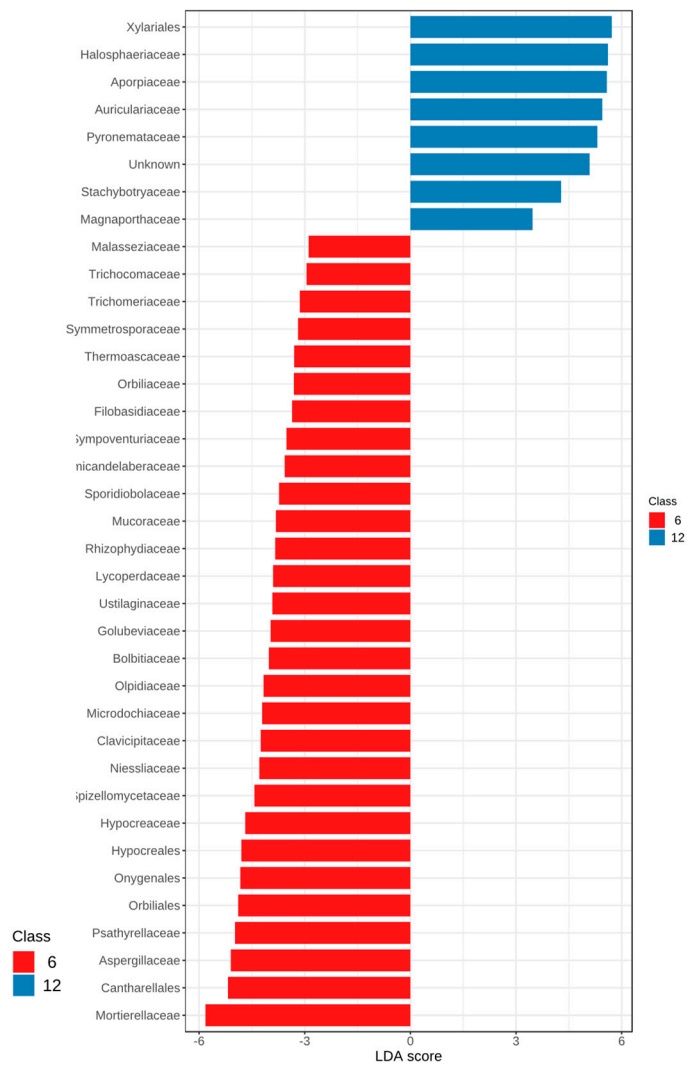

Supplement: s1 [file s1]
